# Supplementary material for: Overwintered Drosophila suzukii Are the Main Source for Infestations of the First Fruit Crops of the Season
Source: PubMed Central journal article supplement (PMC6315960; doi:10.3390/insects9040145), 2018-10-22
Supplement: insects-09-00145-s001.pdf [file insects-09-00145-s001.pdf]

# Overwintered *Drosophila suzukii* Are the Main Source for Infestations of the First Fruit Crops of the Season

Aurore D. C. Panel <sup>1,2</sup>, Laura Zeeman <sup>3,4</sup>, Bart J. van der Sluis <sup>4</sup>, Peter van Elk <sup>4</sup>,  
Bart A. Pannebakker <sup>2</sup>, Bregje Wertheim <sup>1</sup> and Herman H. M. Helsen <sup>4,\*</sup>

<sup>1</sup> Groningen Institute for Evolutionary Life Sciences, University of Groningen, Nijenborgh 7, 9700 CC Groningen, The Netherlands; a.d.c.panel@rug.nl (A.D.C.P.); b.wertheim@rug.nl (B.W.)

<sup>2</sup> Wageningen University & Research, Laboratory of Genetics, PO Box 16, 6700 AA Wageningen, The Netherlands; bart.pannebakker@wur.nl

<sup>3</sup> Wageningen University & Research, Laboratory of Entomology, PO Box 16, 6700 AA Wageningen, The Netherlands; laura.zeeman@wur.nl

<sup>4</sup> Wageningen University & Research, Field Crops, 6670 AE Zetten, The Netherlands; bart.vandersluis@wur.nl (B.J.v.d.S.); peter.vanelk@wur.nl (P.v.E.)

\* Correspondence: herman.helsen@wur.nl; Tel.: +31-488-473-754

## Electronic Supplementary Material

Table S1. Characteristics of the non-crop host species tested in the study in 2016 and 2017.

| Plant species               | Family       | Geographical origin               | Used as ornamental plant | Native in temperate Europe | Management of sampled plant species |
|-----------------------------|--------------|-----------------------------------|--------------------------|----------------------------|-------------------------------------|
| <i>Aucuba japonica</i>      | Garryaceae   | Asia                              | X                        |                            | Planted                             |
| <i>Elaeagnus x ebbingei</i> | Elaeagnaceae | Europe, North America             | X                        | X                          | Planted                             |
| <i>Skimmia japonica</i>     | Rutaceae     | Asia                              | X                        |                            | Planted                             |
| <i>Hedera helix</i>         | Araliaceae   | Europe and Western Asia           | X                        | X                          | Planted, spontaneous                |
| <i>Viscum album</i>         | Santalaceae  | Europe, Western and Southern Asia |                          | X                          | Planted                             |
| <i>Cotoneaster</i> spp.     | Rosaceae     | Central Europe                    | X                        | X                          | Planted                             |

**Table S2.** Collection date, location, habitat and number of fruits sampled for each non-crop host species in 2017, The Netherlands.

| Collection date | Plant species               | Location   | Site <sup>a</sup>     | Latitude    | Longitude  | Habitat                     | No fruits |
|-----------------|-----------------------------|------------|-----------------------|-------------|------------|-----------------------------|-----------|
| April, 17       | <i>Aucuba japonica</i>      | Wageningen | Plantsoen             | 51.97907957 | 5.65587519 | Urban area, private gardens | 65        |
|                 |                             | Wageningen | Arboretum             | 51.96741361 | 5.67643287 | Woody plants, bushes        | 50        |
|                 |                             | Wageningen | Arboretum             | 51.96549334 | 5.69108201 | Woody plants, bushes        | 14        |
|                 |                             | Wageningen | Roghorst              | 51.979784   | 5.668604   | Urban area, private gardens | 40        |
|                 |                             | Zederik    | Smalzijde21A          | 51.8925     | 5.0137     | Private gardens, grassland  | 53        |
|                 |                             | Gouda      | KleinAmerica          | 52.012905   | 4.715813   | Urban area, private gardens | 60        |
|                 | <i>Elaeagnus x ebbingei</i> | Gouda      | Baden Powellplantsoen | 52.008203   | 4.737165   | Urban area, private gardens | 213       |
|                 | <i>Skimmia japonica</i>     | Wageningen | Nassauweg             | 51.966952   | 5.674142   | Urban area, private gardens | 81        |
|                 |                             | Wageningen | Hoogvliet             | 51.965185   | 5.658808   | Urban area, private gardens | 65        |
|                 |                             | Wageningen | Arboretum             | 51.967582   | 5.677586   | Woody plants, bushes        | 109       |
|                 |                             | Zederik    | Smalzijde21A          | 51.8925     | 5.0137     | Private gardens, grassland  | 53        |
|                 | <i>Hedera helix</i>         | Wageningen | Boterstraat           | 51.96409104 | 5.66415024 | Urban area, private gardens | 119       |
|                 |                             | Wageningen | Wallepad              | 51.96417489 | 5.66569162 | Urban area,                 | 633       |

|        |                             |            |                        |             |            |                                                         |     |
|--------|-----------------------------|------------|------------------------|-------------|------------|---------------------------------------------------------|-----|
|        |                             |            |                        |             |            | private gardens                                         |     |
|        |                             | Wageningen | Mennonietenweg         | 51.965864   | 5.656395   | Urban area, private gardens                             | 320 |
|        |                             | Gouda      | Jan de Boerplein       | 52.009644   | 4.738019   | Urban area, private gardens                             | 400 |
|        | <i>Viscum album</i>         | Hedel      | Hedel                  | 51.748802   | 5.241822   | Mistletoe plants on apple trees, organic cherry orchard | 374 |
| May, 8 | <i>Aucuba japonica</i>      | Wageningen | Roghorst*              | 51.978688   | 5.665533   | Urban area, private gardens                             | 80  |
|        |                             | Wageningen | Arboretum              | 51.96741361 | 5.67643287 | Woody plants, bushes                                    | 60  |
|        |                             | Wageningen | Plantsoen              | 51.97907957 | 5.65587519 | Urban area, private gardens                             | 63  |
|        |                             | Gouda      | KleinAmerica           | 52.012905   | 4.715813   | Urban area, private gardens                             | 53  |
|        |                             | Zederik    | Smalzijde21A*          | 51.8925     | 5.0137     | Private gardens, grassland                              | 65  |
|        | <i>Elaeagnus x ebbingei</i> | Ede        | Jan Tooroplaan         | 52.02570898 | 5.66827097 | Urban area, private gardens                             | 22  |
|        |                             | Gouda      | Baden Powellplantsoen* | 52.008203   | 4.737165   | Urban area, private gardens                             | 300 |
|        | <i>Skimmia japonica</i>     | Zederik    | Smalzijde21A           | 51.8925     | 5.0137     | Private gardens, grassland                              | 60  |
|        |                             | Wageningen | Nassauweg              | 51.966952   | 5.674142   | Urban area, private gardens                             | 71  |

|  |                     |            |                  |             |            |                                                         |     |
|--|---------------------|------------|------------------|-------------|------------|---------------------------------------------------------|-----|
|  |                     | Wageningen | Hoogvliet        | 51.965185   | 5.658808   | Urban area, private gardens                             | 154 |
|  |                     | Wageningen | Arboretum*       | 51.967582   | 5.677586   | Woody plants, bushes                                    | 62  |
|  | <i>Hedera helix</i> | Ede        | Frans Halslaan   | 52.01697278 | 5.65557069 | Urban area, private gardens                             | 180 |
|  |                     | Wageningen | Wallepad*        | 51.96417489 | 5.66569162 | Urban area, private gardens                             | 500 |
|  |                     | Gouda      | Jan de Boerplein | 52.009644   | 4.738019   | Urban area, private gardens                             | 720 |
|  | <i>Viscum album</i> | Hedel      | Hedel*           | 51.748802   | 5.241822   | Mistletoe plants on apple trees, organic cherry orchard | 412 |

<sup>a</sup> Single asterisk indicates the sites from which non-crop fruits used for the no-choice laboratory trials were sampled.

**Table S3.** Additional locations and habitats of weekly sampled *Aucuba japonica* fruits in the study area, The Netherlands, during 2017.

| Area       | Location   | Site            | Latitude    | Longitude  | Habitat                        |
|------------|------------|-----------------|-------------|------------|--------------------------------|
| Zederik    | Zederik    | Smalzijde21A    | 51.8925     | 5.0137     | Private gardens,<br>grassland  |
| Gouda      | Gouda      | KleinAmerica    | 52.012905   | 4.715813   | Urban area,<br>private gardens |
| Wageningen | Bennekom   | Vossenweg       | 52.008014   | 5.674786   | Urban area,<br>private gardens |
|            | Bennekom   | Selterskampweg  | 51.999225   | 5.685515   |                                |
|            | Bennekom   | Diedenweg       | 51.996014   | 5.684019   |                                |
|            | Wageningen | Arboretum 1     | 51.96549334 | 5.69108201 | Woody plants,<br>bushes        |
|            | Wageningen | Arboretum 2     | 51.96741361 | 5.67643287 |                                |
|            | Wageningen | Belmonte        | 51.96847818 | 5.69365962 | Urban area,<br>private gardens |
|            | Wageningen | Bevrijdingskerk | 51.96953857 | 5.67260378 |                                |
|            | Wageningen | Roghorst 1      | 51.979819   | 5.668446   |                                |
|            | Wageningen | Roghorst 2      | 51.979784   | 5.668604   |                                |
|            | Wageningen | Roghorst 3      | 51.979715   | 5.664474   |                                |
|            | Wageningen | Roghorst 4      | 51.9786880  | 5.665533   |                                |
|            | Wageningen | Hinkeloordseweg | 51.96646397 | 5.67499847 |                                |
|            | Wageningen | Nassauweg       | 51.96691077 | 5.67437355 |                                |
|            | Wageningen | Plantsoen       | 51.97907957 | 5.65587519 |                                |
|            | Wageningen | Tarthorst       | 51.979659   | 5.659883   |                                |

**Table S4.** Locations and monitoring sites of *D. suzukii* adults in the study area from 2016 to 2017, The Netherlands.

| Site location | Trap code | Collection site | Latitude    | Longitude  | Habitat typology         |
|---------------|-----------|-----------------|-------------|------------|--------------------------|
| Kesteren      | 1         | Cherry orchard  | 51.92987456 | 5.55133357 | Cherry orchard           |
|               | 2         | Cherry orchard  | 51.9327303  | 5.54525957 |                          |
|               | 3         | Cherry orchard  | 51.93386368 | 5.54411641 |                          |
|               | 4         | Hedgerow        | 51.93401558 | 5.5539907  |                          |
|               | 5         | Private garden  | 51.93423394 | 5.55469314 |                          |
| Wageningen    | 6         | Apple tree      | 51.97442993 | 5.69791237 | Vineyard and wood        |
|               | 7         | Bushes          | 51.97429792 | 5.69559795 |                          |
| Randwijk      | 8         | Berry orchard   | 51.93749487 | 5.7084881  | Cherry and berry orchard |
|               | 9         | Cherry orchard  | 51.93748266 | 5.70439969 |                          |

**Table S5.** Number (No.) of *D. suzukii* adults emerged from *Viscum album* fruits collected in the study area, Hedel, The Netherlands, during 2016.

| <b>Collection date</b> | <b>No. of collected fruits</b> | <b>No. of <i>D.suzukii</i> adults reared</b> | <b>Infestation rate (%)</b> |
|------------------------|--------------------------------|----------------------------------------------|-----------------------------|
| March, 30              | 180                            | 0                                            | 0                           |
| April, 28              | 140                            | 0                                            | 0                           |
| May, 4                 | 200                            | 0                                            | 0                           |
| May, 12                | 727                            | 7                                            | 1                           |
| June, 2                | 402                            | 14                                           | 3.5                         |
| June, 9                | 221                            | 34                                           | 15.4                        |
